# Supplementary material
Source: Springer Nature journal article supplement (https://www.springermedizin.de/resource/supplementary/12967_2008_268_MOESM1_ESM.pdf/9576072)

**A**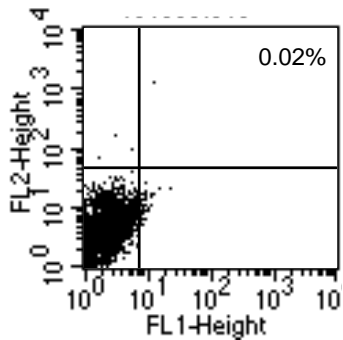**B**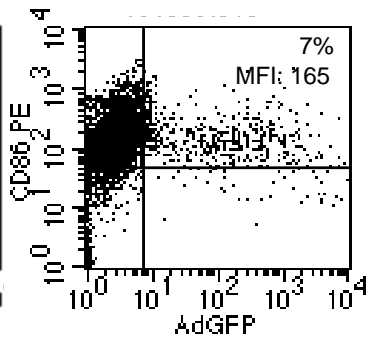**C**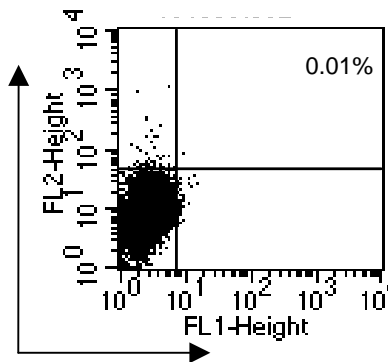**D**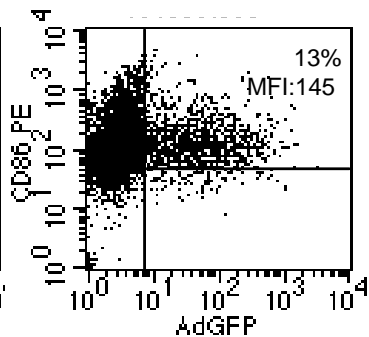

Supplement: MOESM1 [file 9576072]
